# Supplementary material for: Involvement of Abscisic Acid in Transition of <em>Pisum sativum</em> L. from Germination to Post-germination Stage
Source: Preprints.org preprint supplement (doi:10.20944/preprints202312.0818.v1), 2023-12-12
Supplement: Supplementary file 1 [file supplementary]

**Supplementary Figures**

Involvement of abscisic acid in transition of *Pisum sativum* L. from germination to post-germination stage

Galina Smolikova, Ekaterina Krylova, Ivan Petřík, Polina Vilis, Aleksander Vikhorev, Ksenia Strygina, Miroslav Strnad, Andrej Frolov, Elena Khlestkina and Sergei Medvedev


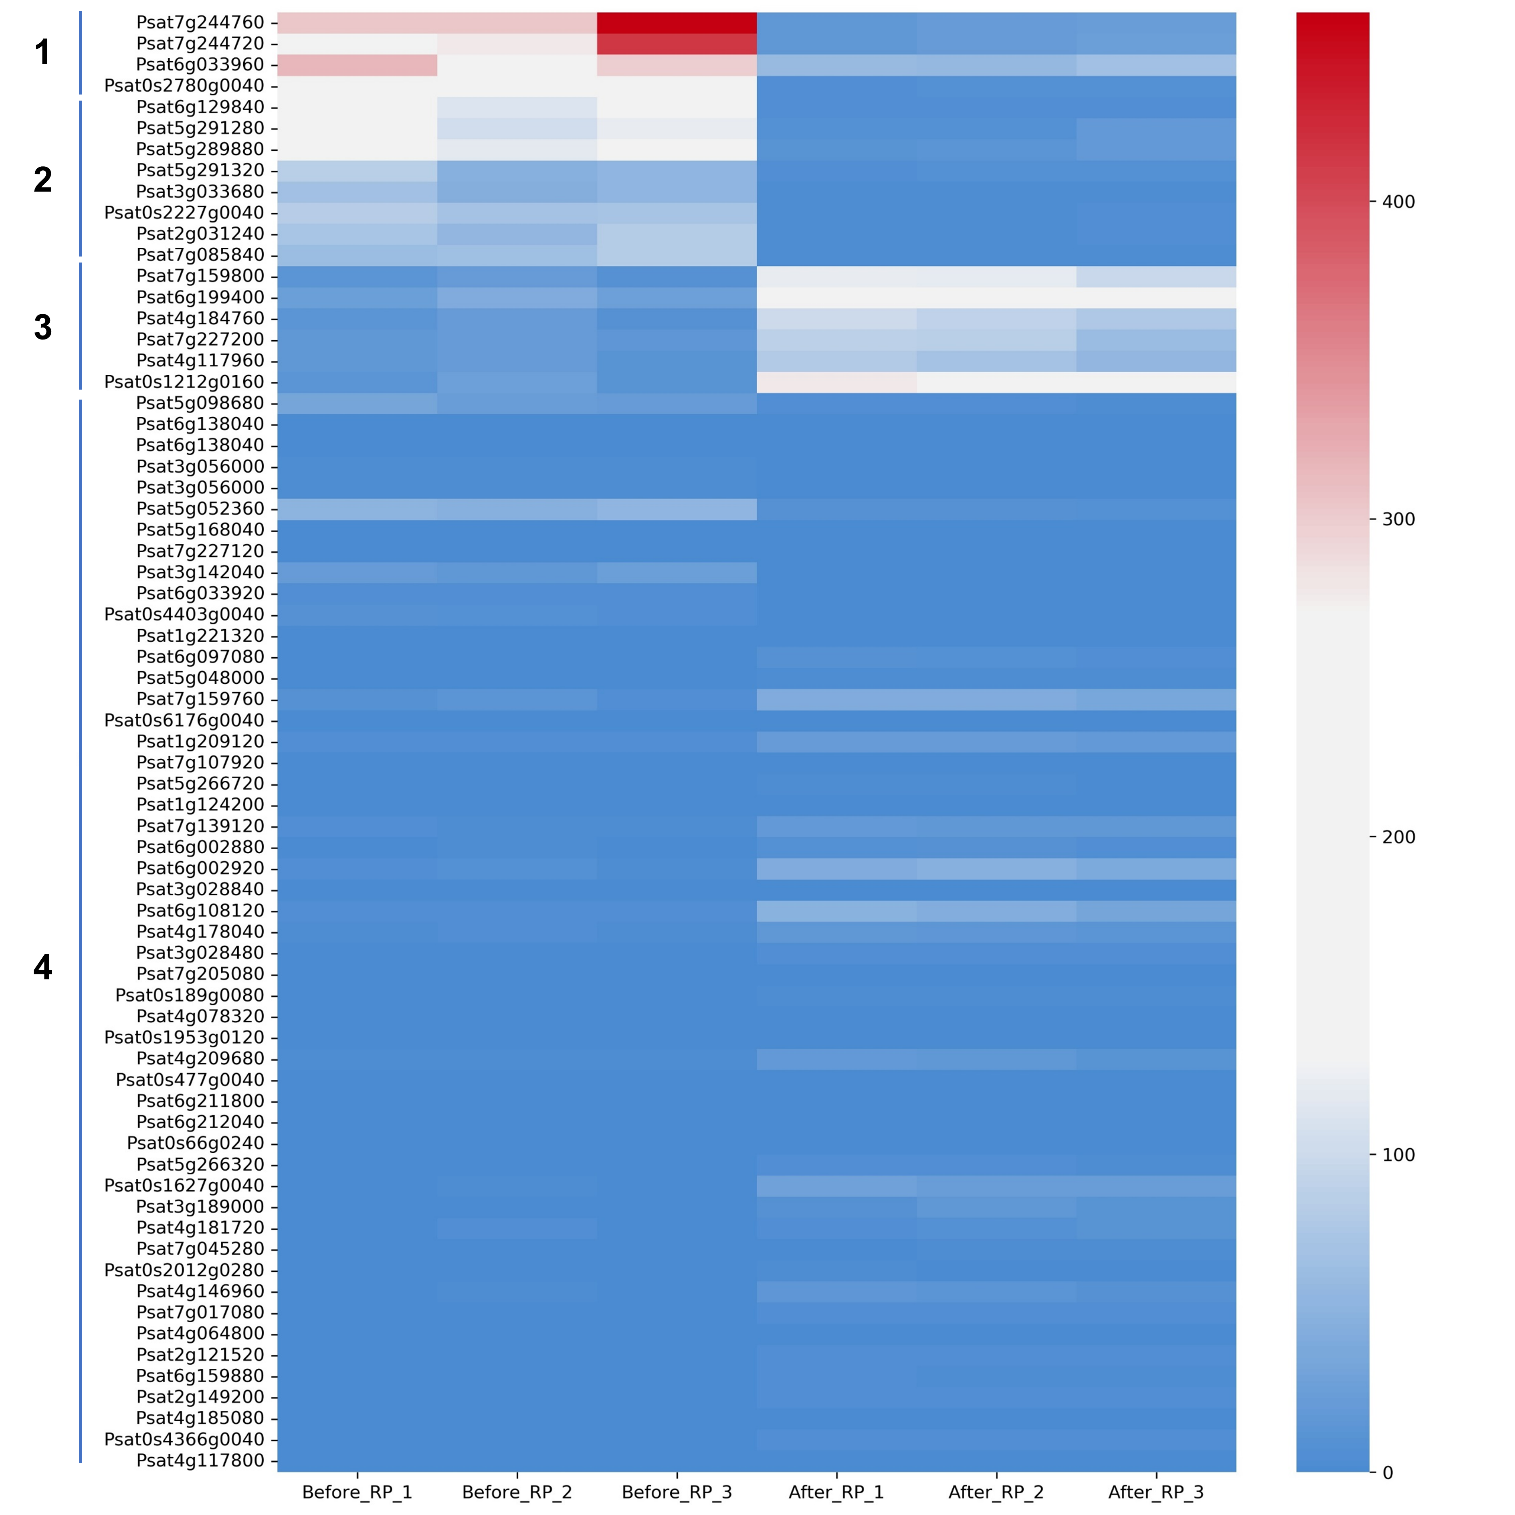


**Figure S1.** Expression heatmap of ABA-associated DEGs in embryonic axes of P. sativum before and after radicle protrusion (RP) The red and blue color denotes high and low values of RPKM-normalized gene expression, respectably. The red-white-blue gradient represents the change of values from high to low. 1-4 – clusters of genes with similar expression behavior (obtained using k-means algorithm.)


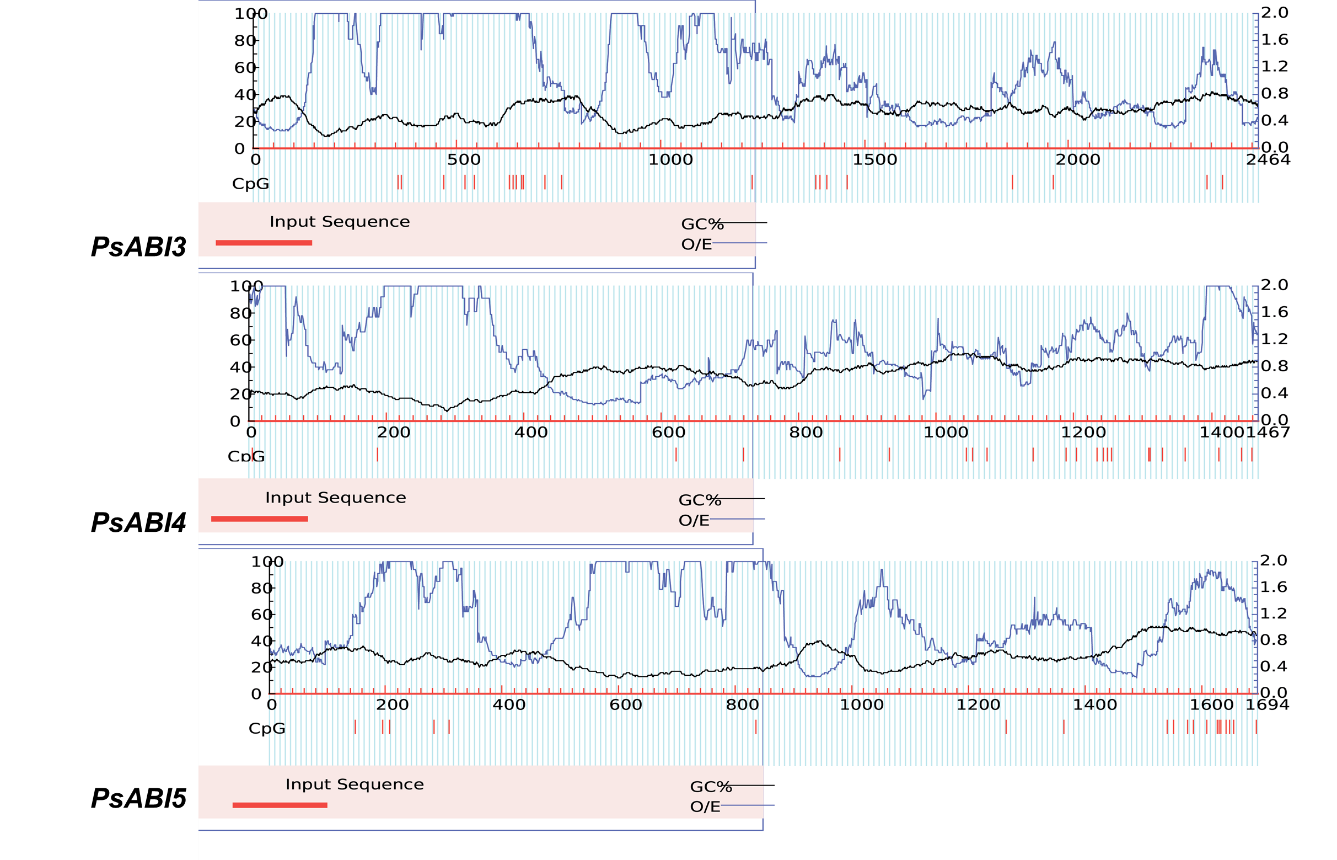


**Figure S2.** Predicted methylation sites for CpG motifs in the sequences of the seed resistance to dehydration genes in the *P. sativum* genome. CpG sites are marked with red vertical lines. GC% – black line. O / E – blue line.


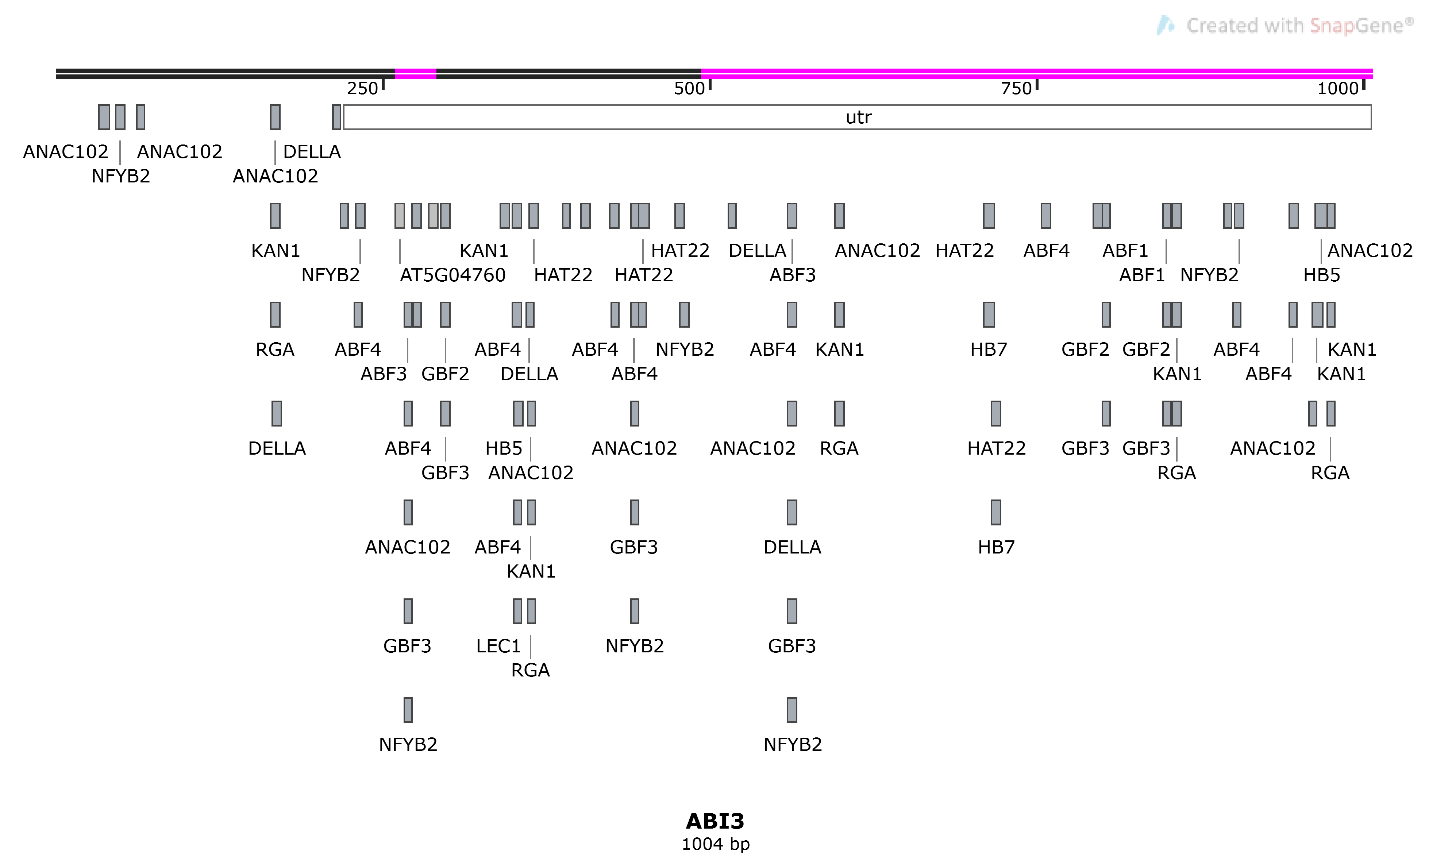


**Figure S3.** Mapping of the P*sABI3* gene promoter.

**
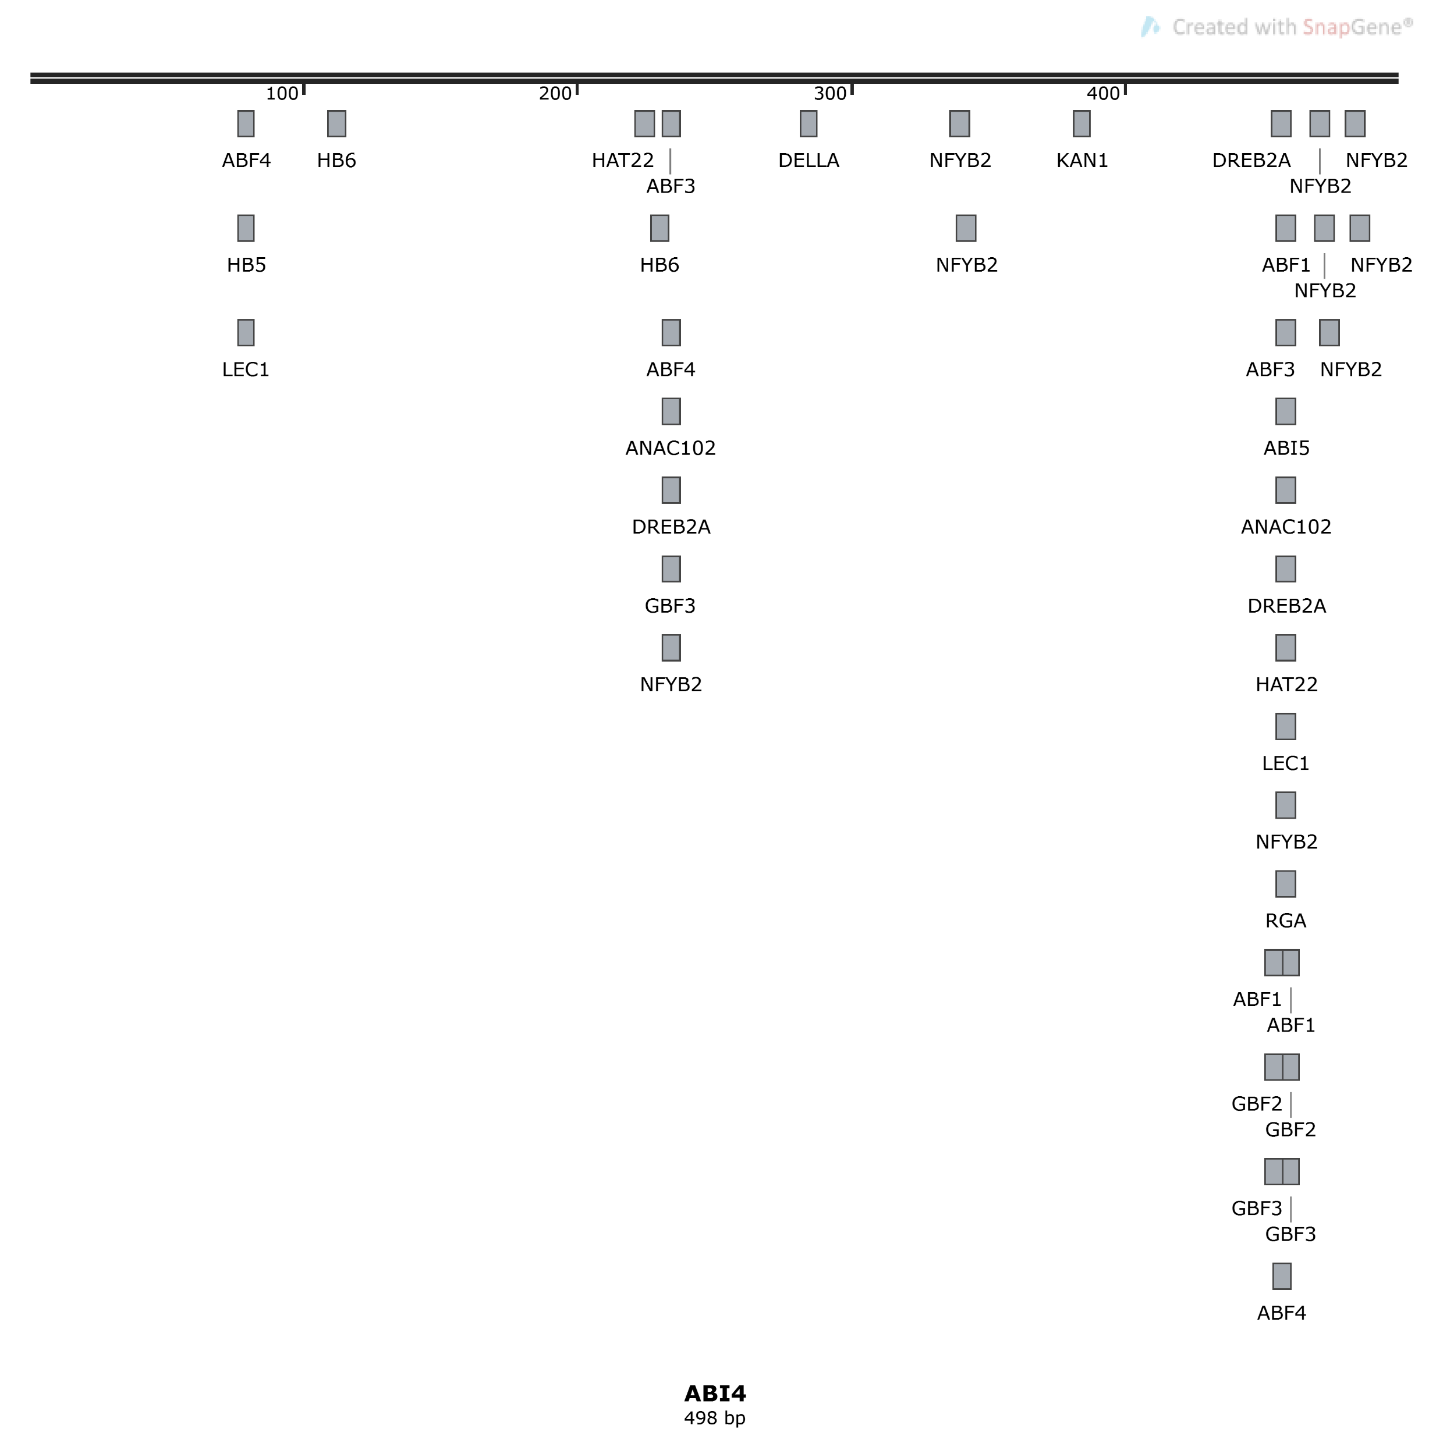
**

**Figure S4.** Mapping of the *PsABI4* gene promoter**.**

**
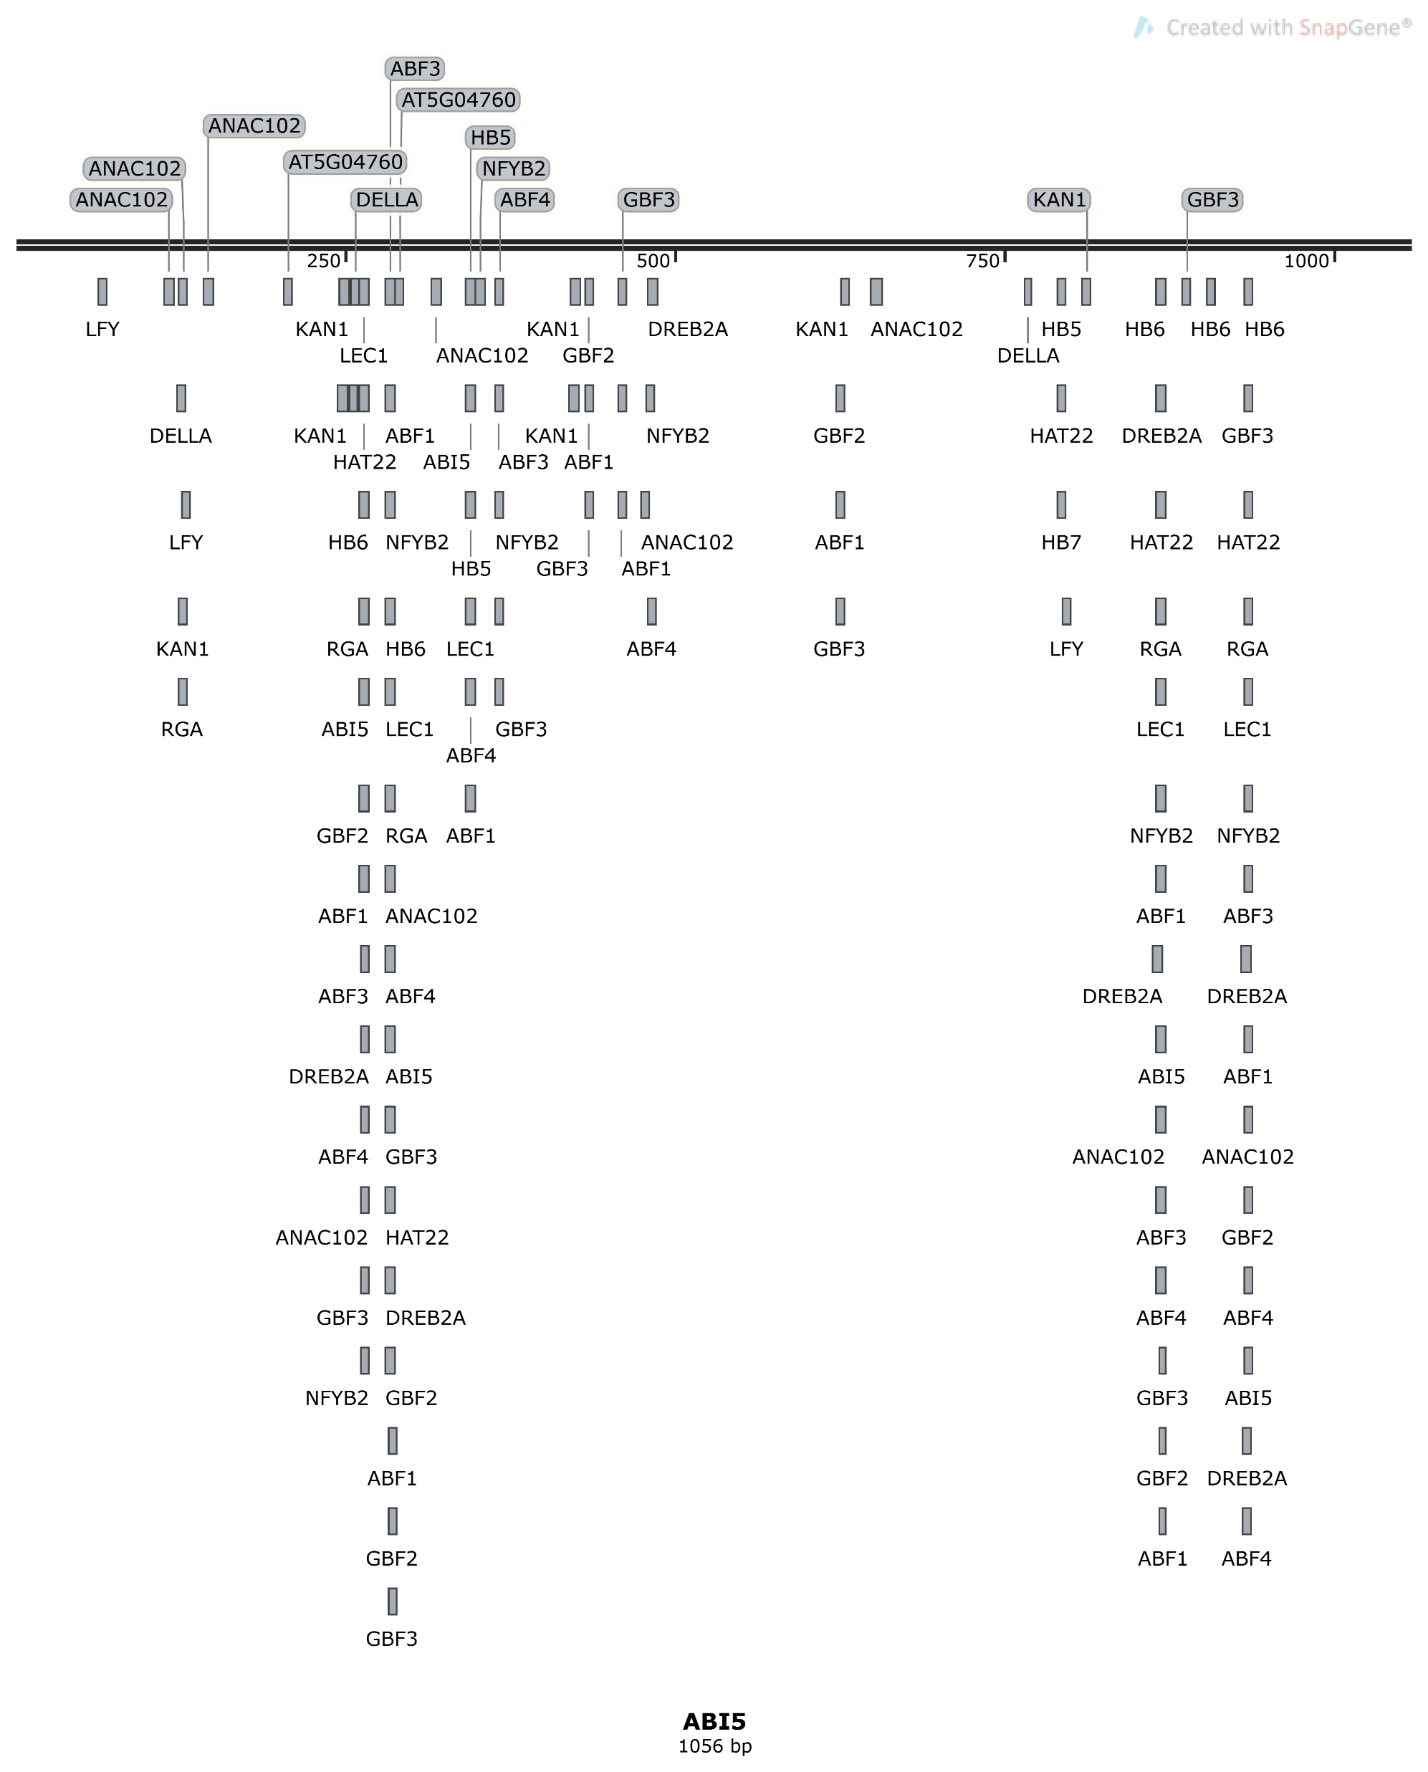
**

**Figure S5.** Mapping of the *PsABI5* gene promoter**.**
